# Supplementary material
Source: publisher site journal article supplement (https://www.dovepress.com/article/296424)
Supplement: Supplementary file 1 [file get_supplementary_file.php]

**Supplementary TABLE 1** Gene panel associated with leukodystrophies

| AARS2 | ABAT | ABCD1 | ACOX1 | ADGRG1 | AIMP1 | ALDH3A2 |
| --- | --- | --- | --- | --- | --- | --- |
| AMACR | APP | ARSA | ARSE | ASPA | ATP13A2 | AUH |
| BCAP31 | BCS1L | C19orf12 | CLCN2 | COASY | COX15 | COX6B1 |
| CSF1R | CTC1 | CYP27A1 | DARS2 | DCAF17 | DDC | DLD |
| EARS2 | EIF2B1 | EIF2B2 | EIF2B3 | EIF2B4 | EIF2B5 | ERCC6 |
| ERCC8 | ETHE1 | FA2H | FAM126A | FASTKD2 | FKTN | FOLR1 |
| FOXRED1 | FTL | FUCA1 | GALC | GAN | GCDH | GFAP |
| GJA1 | GJB1 | GJC2 | HEPACAM | HIKESHI | HSPD1 | HTRA1 |
| L2HGDH | LMNB1 | MCCC1 | MGP | MLC1 | MPV17 | NAXE |
| NDUFA1 | NDUFA10 | NDUFA11 | NDUFA12 | NDUFA2 | NDUFA9 | NDUFAF1 |
| NDUFAF2 | NDUFAF3 | NDUFAF4 | NDUFB3 | NDUFS1 | NDUFS2 | NDUFS3 |
| NDUFS4 | NDUFS6 | NDUFS7 | NDUFS8 | NDUFV1 | NDUFV2 | NOTCH3 |
| NUBPL | PANK2 | PC | PEX1 | PEX10 | PEX12 | PEX13 |
| PEX14 | PEX16 | PEX19 | PEX2 | PEX26 | PEX3 | PEX5 |
| PEX6 | PEX7 | PHYH | PLA2G6 | PLEKHG2 | PLP1 | POLR1C |
| POLR3A | POLR3B | PSAP | PYCR2 | RARS | RNASET2 | RPIA |
| SAMHD1 | SCP2 | SDHA | SDHAF1 | SLC16A2 | SLC17A5 | SNORD118 |
| SOX10 | SUMF1 | SURF1 | TREM2 | TREX1 | TUBB4A | TUFM |
| TYMP | TYROBP | VPS11 | WDR45 |  |  |  |


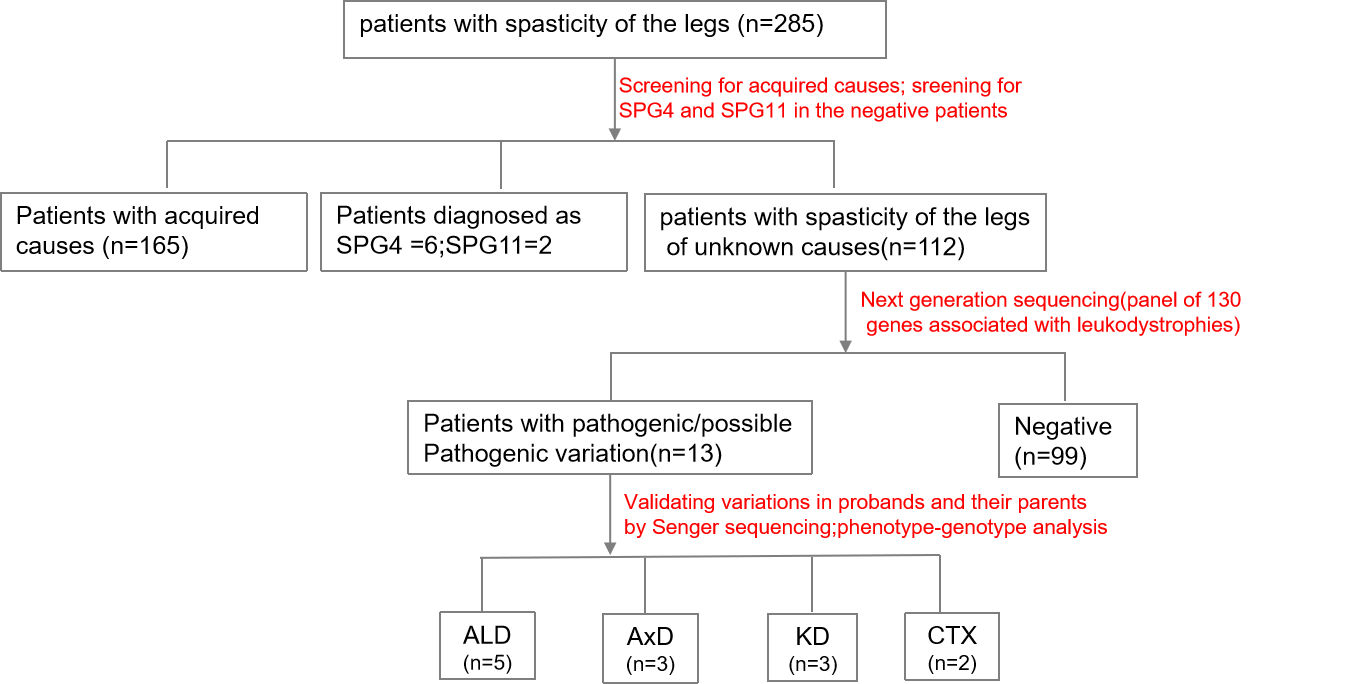


**Supplementary Figure 1** Flow chart showing workﬂow and results in this cohort. SPG：Hereditary spastic paraplegia; ALD: adrenoleukodystrophy; AxD: Alexander disease; KD: Krabbe disease; CTX: cerebrotendinous xanthomatosis.
